# Supplementary material for: Flexible electrochromic devices based on tungsten oxide and Prussian blue nanoparticles for automobile applications
Source: Royal Society of Chemistry journal article supplement (doi:10.1039/d1ra05280b), 2021-01-01
Supplement: d1ra05280b1.pdf [file d1ra05280b1.pdf]

Electronic Supplementary Information (ESI)

**Flexible electrochromic devices based on tungsten oxide  
and Prussian blue nanoparticles for automobile  
applications**

Chan Yang Jeong<sup>a,b</sup>, Takashi Kubota<sup>b</sup>, and Kazuki Tajima<sup>b,\*</sup>

*<sup>a</sup>Kitami Institute of Technology (KIT), 165 Koen-cho, Kitami, Hokkaido 090-8507,*

*Japan*

*<sup>b</sup>National Institute of Advanced Industrial Science and Technology (AIST), 1-1-1*

*Higashi, Tsukuba, Ibaraki 305-8565, Japan*

\*Corresponding author: [k-tajima@aist.go.jp](mailto:k-tajima@aist.go.jp)

**Table S1** Properties of the PB- and WO<sub>3</sub>-NP dispersible inks with varying PVA

contents of 10 and 1 wt.%, respectively.

|                                            | PB-10 wt%.<br>PVA ink | WO <sub>3</sub> -1 wt%.<br>PVA ink |
|--------------------------------------------|-----------------------|------------------------------------|
| Surface tension (mN/m)                     | 45.1                  | 52.3                               |
| Viscosity (cP)                             | 19.4                  | 7.3                                |
| Density (g/cm <sup>3</sup> )               | 1.08                  | 4.07                               |
| pH                                         | 6.7                   | 4.9                                |
| Contact angle (°)<br>(before UV treatment) | 93.6                  | 48.8                               |
| Contact angle (°)<br>(after UV treatment)  | 48.8                  | 46.4                               |

**Table S2** Spin-coating conditions for the preparation of 1 μm-thick WO<sub>3</sub> and PB thin

films.

| Viscosity (cP) | Revolution (rpm) | Time (s) |
|----------------|------------------|----------|
| 1–10           | 300              | 600 s    |
| 10–14          | 360              | 600 s    |
| 14–17          | 400              | 600 s    |
| 17–35          | 500              | 10 s     |
|                | 1000             | 10 s     |

**Table S3** Estimated thicknesses of the WO<sub>3</sub> and PB thin films.

| Substrate | Sample          | substrate area (cm <sup>2</sup> ) | substrate before spin coating (g) | substrate after spin coating (g)<br>(evaporated suspension) | Amount of coated (g) | Estimated film thickness (μm) |
|-----------|-----------------|-----------------------------------|-----------------------------------|-------------------------------------------------------------|----------------------|-------------------------------|
| ITO/PET   | WO <sub>3</sub> | 25                                | 0.3722                            | 0.3823                                                      | 0.0101               | 1.24                          |
|           | PB              | 25                                | 0.3740                            | 0.3770                                                      | 0.0031               | 1.11                          |
| ITO/glass | WO <sub>3</sub> | 25                                | 4.4302                            | 4.4394                                                      | 0.0092               | 1.13                          |
|           | PB              | 25                                | 4.3854                            | 4.3882                                                      | 0.0028               | 1.04                          |

**Table S4** Details of the haze and chromaticity of PET-based and glass-based ECDs in the coloured and transparent states.

| Substrate | colour states | Estimate colour                                                                     | Haze | L*    | a*     | b*     |
|-----------|---------------|-------------------------------------------------------------------------------------|------|-------|--------|--------|
| PET       | Coloured      |  | 3.61 | 47.67 | -18.28 | -38.89 |
|           | Transparent   |  | 2.93 | 91.35 | -2.63  | 3.6    |
| Glass     | Coloured      |  | 3.06 | 41.99 | -15.51 | -42.96 |
|           | Transparent   |  | 4.19 | 88.94 | -7.58  | 1.65   |

**Table S5** Transmittance (T), optical density (OD), coloration efficiency (CE), and optical switching time at a wavelength of 633 nm for ECDs fabricated under different light aging conditions in their colored and bleached states.

| Wavelength (nm) | Substrate | ECD area (cm <sup>2</sup> ) | $T_{\text{bleached}}$ (%) | $T_{\text{colored}}$ (%) | Charge (C) | Current density (C/cm <sup>2</sup> ) | $A_{\text{bleached}}$ | $A_{\text{colored}}$ | Optical density ( $\Delta\text{OD}$ ) | CE (cm <sup>2</sup> /C) |
|-----------------|-----------|-----------------------------|---------------------------|--------------------------|------------|--------------------------------------|-----------------------|----------------------|---------------------------------------|-------------------------|
| 633             | PET       | 16                          | 79.89                     | 1.31                     | 0.23       | 0.01                                 | 0.10                  | 1.88                 | 1.78                                  | 123.32                  |
|                 | Glass     | 16                          | 80.00                     | 0.32                     | 0.44       | 0.03                                 | 0.10                  | 2.50                 | 2.40                                  | 86.44                   |

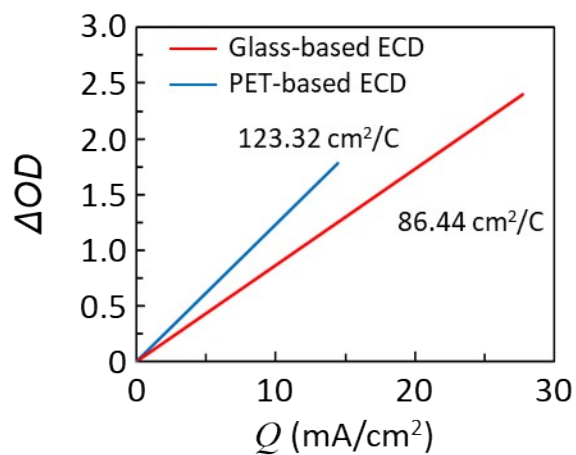

**Figure S1** The *in situ* optical density change with respect to the charge density of PET-based and glass-based ECDs.
